# Supplementary material
Source: PubMed Central journal article supplement (PMC2803072)

## SUPPLEMENTARY INFORMATION

Supplementary Figure 1. Log-scale Receiver Operating Characteristic (ROC) curves of  $T_{\text{geno}}$  with Illumina HumanHap550 data from multiple GWAS scenarios of subjects of European descent.

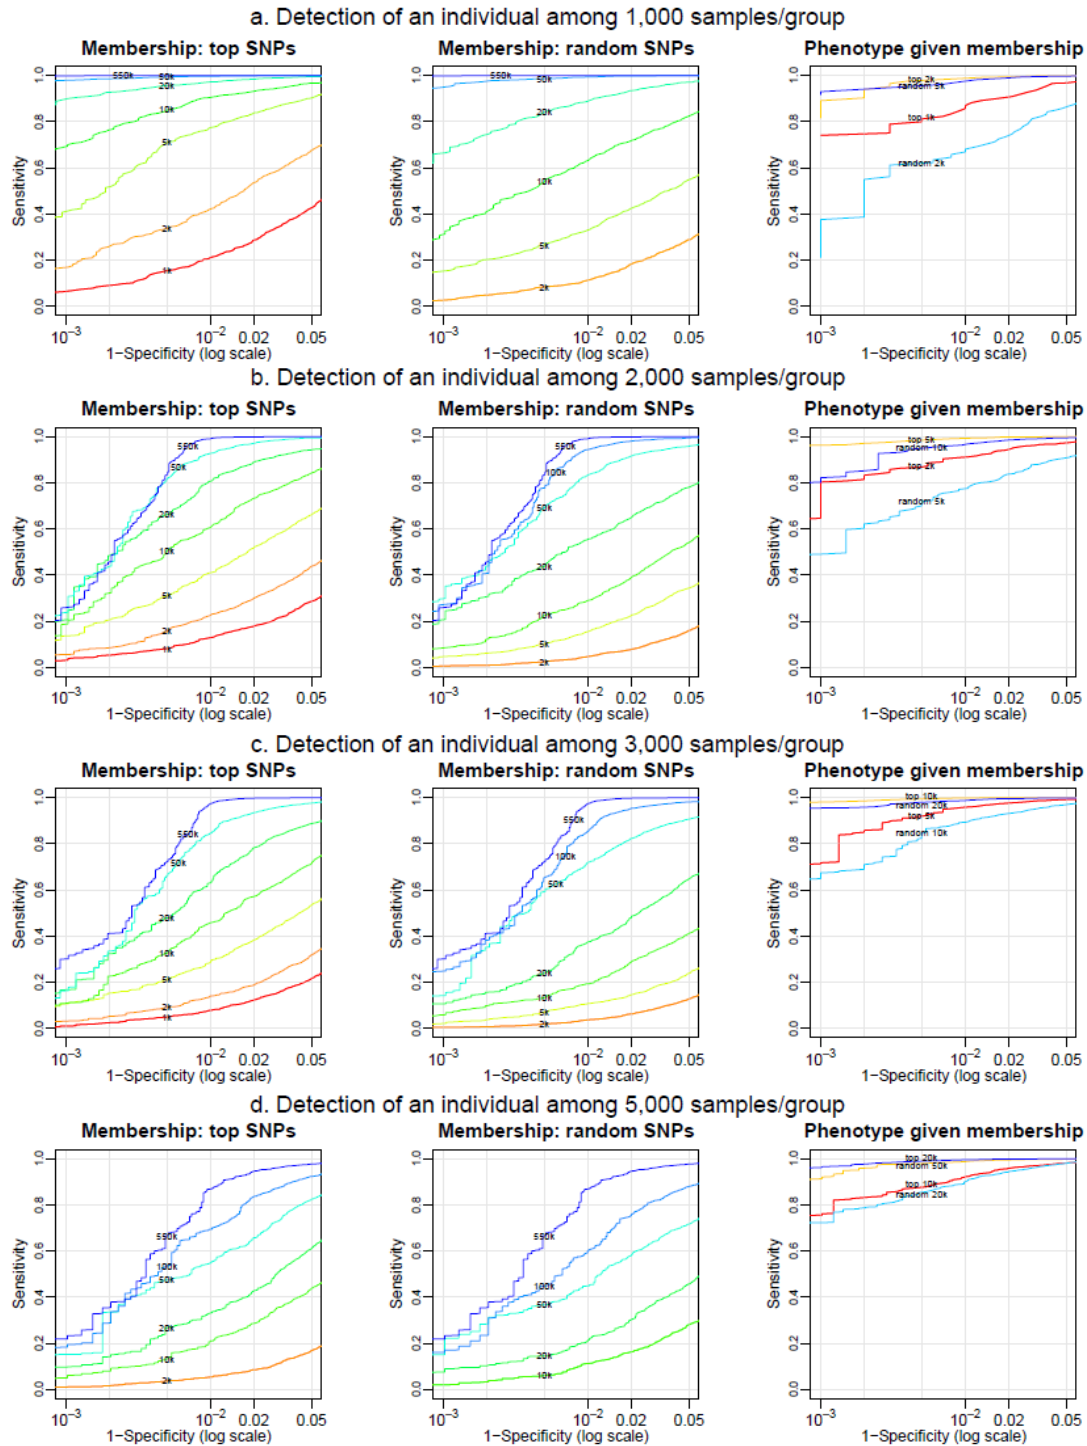

**Supplementary Figure 2. Receiver Operating Characteristic (ROC) curves of  $T_{\text{geno}}$  with Illumina HumanHap550 data from multiple GWAS scenarios of subjects of European descent.**

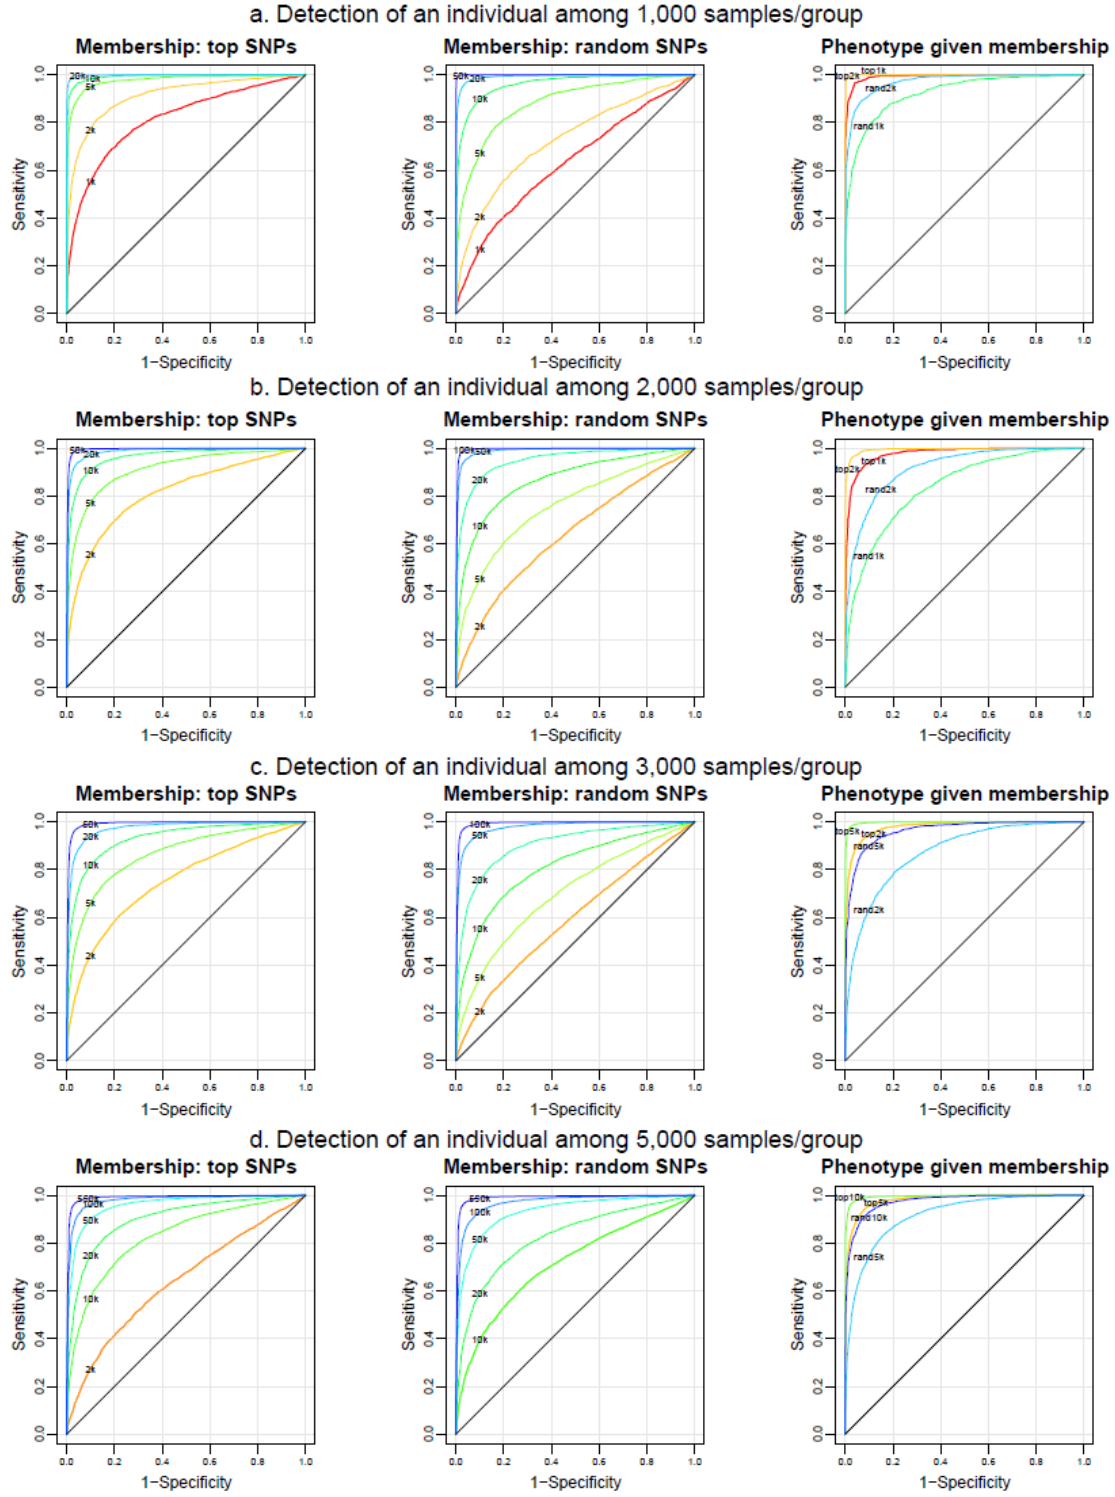

**Supplementary Figure 3. Log-scale Receiver Operating Characteristic (ROC) curves of  $T_{allele}$  with Illumina HumanHap550 data from multiple GWAS scenarios of subjects of European descent.**

**a. Detection of an individual among 1,000 samples/group**

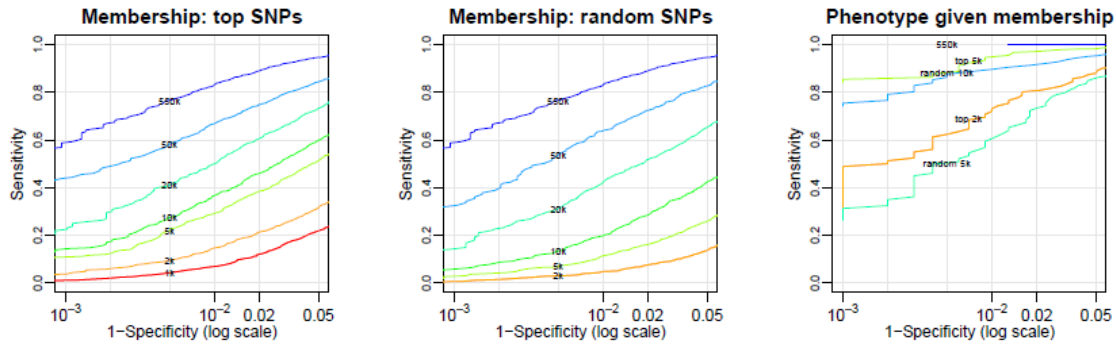

**b. Detection of an individual among 2,000 samples/group**

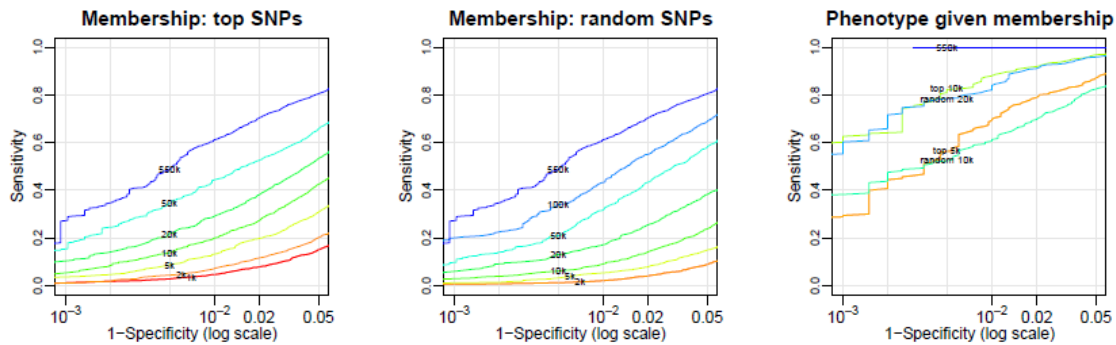

**c. Detection of an individual among 3,000 samples/group**

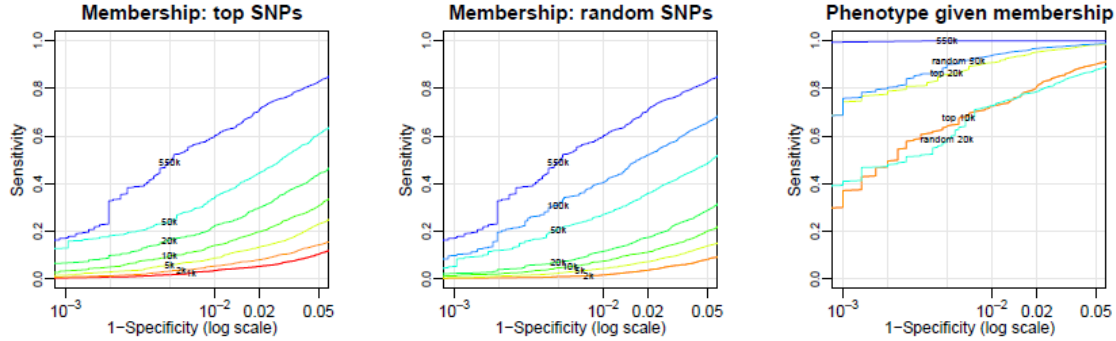

**d. Detection of an individual among 5,000 samples/group**

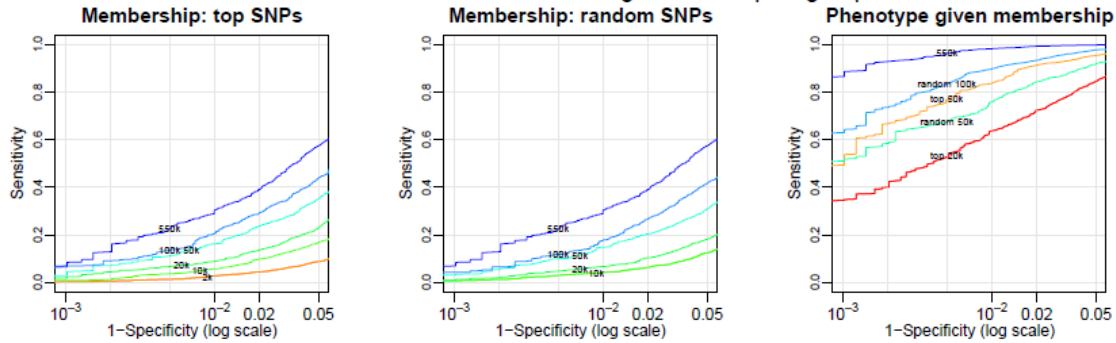

Supplement: NIHMS146117-supplement-1.pdf [file NIHMS146117-supplement-1.pdf]
